# Supplementary material
Source: Springer Nature journal article supplement (https://www.springermedizin.de/resource/supplementary/12958_2010_839_MOESM11_ESM.pdf/9568978)
Supplement: MOESM11 [file 9568978]

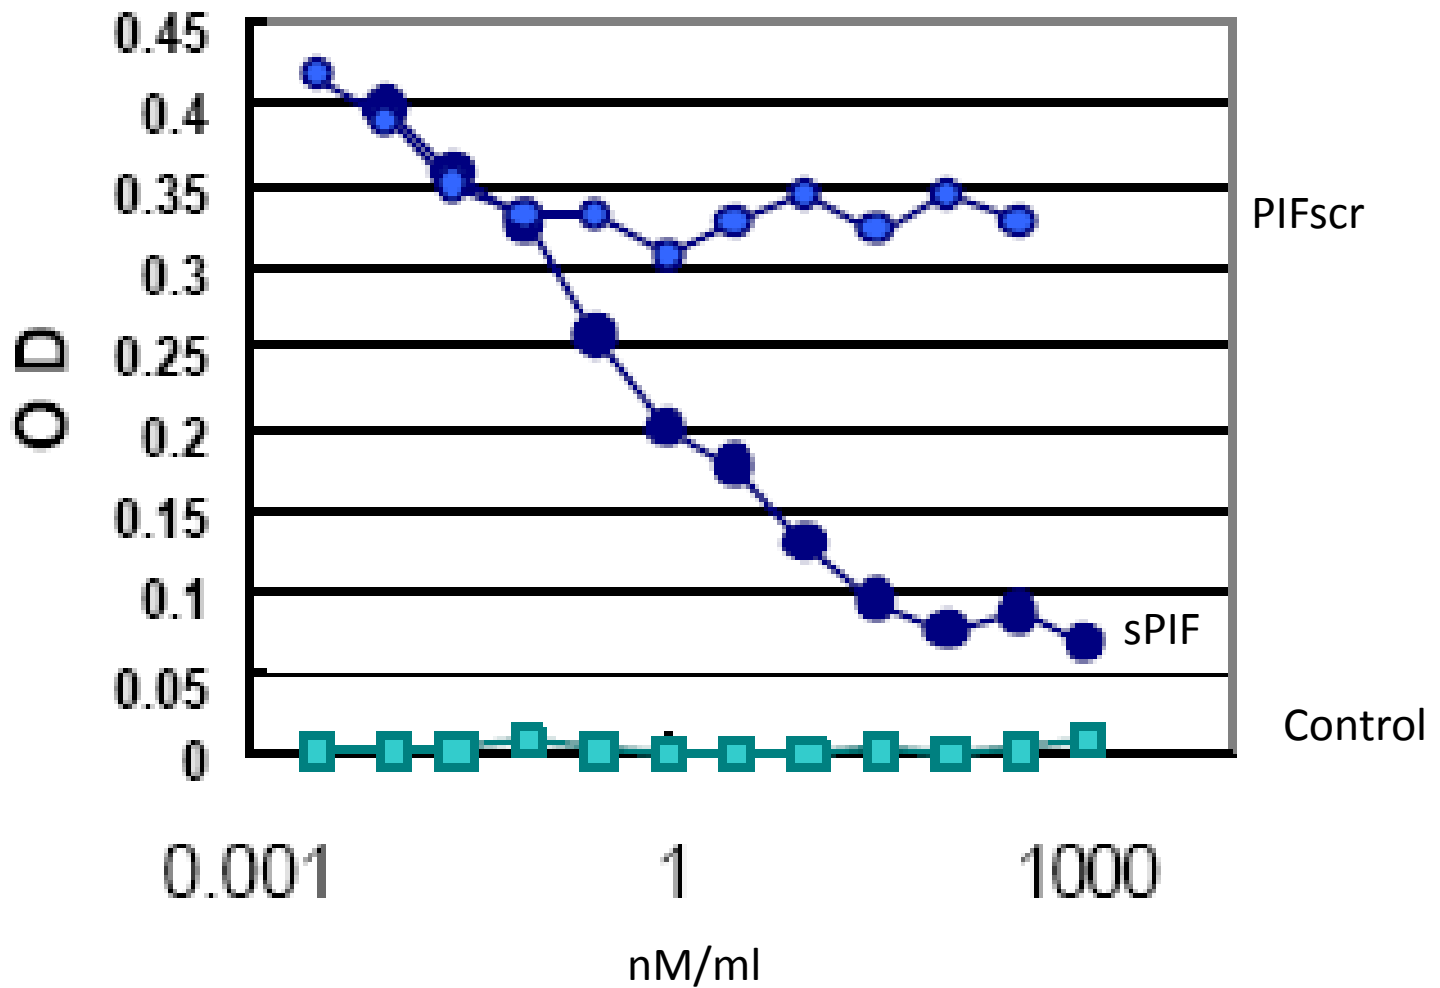

Comparison Anti-PIF-IgG binding to PIF vs PIFscr. Affinity purified anti-PIF-IgG was tested against 4.5  $\mu\text{g/ml}$  sPIF significant binding was found at 10-30 pM IC at 500-700 pM. Linearity up to 30nM vs. PIFscr which did not compete Biotin-PIF.

Figure S2
